# Supplementary material for: Olfactory expression of trace amine-associated receptors requires cooperative cis-acting enhancers
Source: PubMed Central journal article supplement (PMC8213819; doi:10.1038/s41467-021-23824-3), 2021-06-18
Supplement: 41467_2021_23824_MOESM1_ESM.pdf [file 41467_2021_23824_MOESM1_ESM.pdf]

## Supplementary Data

**Olfactory expression of trace amine-associated receptors requires cooperative *cis*-acting enhancers.**

Shah et al.

**Supplementary Table 1: Sequences for primers used in qPCR analysis**

| Primer       | Sequence (5' – 3')      |
|--------------|-------------------------|
| TAAR2 fwd    | CGGATTCACCATCATGCCAT    |
| TAAR2 rev    | CTAAGCATCAGGTCGAAGCT    |
| TAAR3 fwd    | GTCATGGGGGTGTTTCTAG     |
| TAAR3 rev    | AGAAGATCCAGCACTATGATG   |
| TAAR4 fwd    | TGGAGCTCCCCAGAAGTAC     |
| TAAR4 rev    | GCTGCTTGAAGTGGGCAATAG   |
| TAAR5 fwd    | CTTCTTAACTTCATCACCCAC   |
| TAAR5 rev    | AATCAACAGTCGGTGTCTTG    |
| TAAR6 fwd    | CAACTCAGCCATGAACCCTC    |
| TAAR6 rev    | CACCTGGCCACTCATAATAAC   |
| TAAR7a fwd   | TGATCAATCTAGAACCATGAATG |
| TAAR7a rev   | GACCTGTTCAGGTTCTCATAG   |
| TAAR7b fwd   | ATTCAGGCAGCTACACTCC     |
| TAAR7b rev   | TCAGCACAGGCCAAGGACA     |
| TAAR7d fwd   | TTCCATTCTTGCTTTGAAGGG   |
| TAAR7d rev   | AGCACAAGTGAAGAGAGAG     |
| TAAR7e fwd   | AAGTGATGAATTATGCITCTGCC |
| TAAR7e rev   | AATCCTCAGATTCACCAAAATG  |
| TAAR7f fwd   | CTGGGTCITTTATCAACTTCTC  |
| TAAR7f rev   | ATCATCACAAGGGTGGGAATG   |
| TAAR8a-c fwd | GTGAATCATCCTCAGAGAGTC   |
| TAAR8a-c rev | TATGGGAGCCACGAGACC      |
| TAAR9 fwd    | CCTCGAGCCATCCTCTATG     |
| TAAR9 rev    | CAGGAAGTTCGTAGGCGTG     |
| Olf160 fwd   | GAGGGCTAACTAACAGGCCA    |
| Olf160 rev   | TCAAGGTGATCATGCCAGA     |
| Olf16 fwd    | TTGTTGGTTTGTGGGTCTTTAG  |
| Olf16 rev    | CAAAAGGGCAAATGGAACATG   |
| Olf545 fwd   | ATTGTCTACCGTGTGGCTC     |
| Olf545 rev   | AGGAATGACCTTACCAGGTG    |
| Olf73 fwd    | CCGCAACCCTCTACTCTAC     |
| Olf73 rev    | ATTCAAGGCAGAGCAGGTC     |
| Olf961 fwd   | ACTCAATAGTGCCATCATCTTG  |
| Olf961 rev   | TGGTTTCCTTCACAGTCTCA    |
| NCAM fwd     | ACCATCTACAACGCCAACATC   |
| NCAM rev     | CATCACAGACAATCACAGCATC  |
| Gnal fwd     | CAACCCCGAGGAAAAGAAG     |
| Gnal rev     | CAGTGGAACTGGAGGTATG     |
| Bgus fwd     | GCTGATCACCCACACCAAAG    |
| Bgus rev     | CACAGATAACATCCACGTACG   |

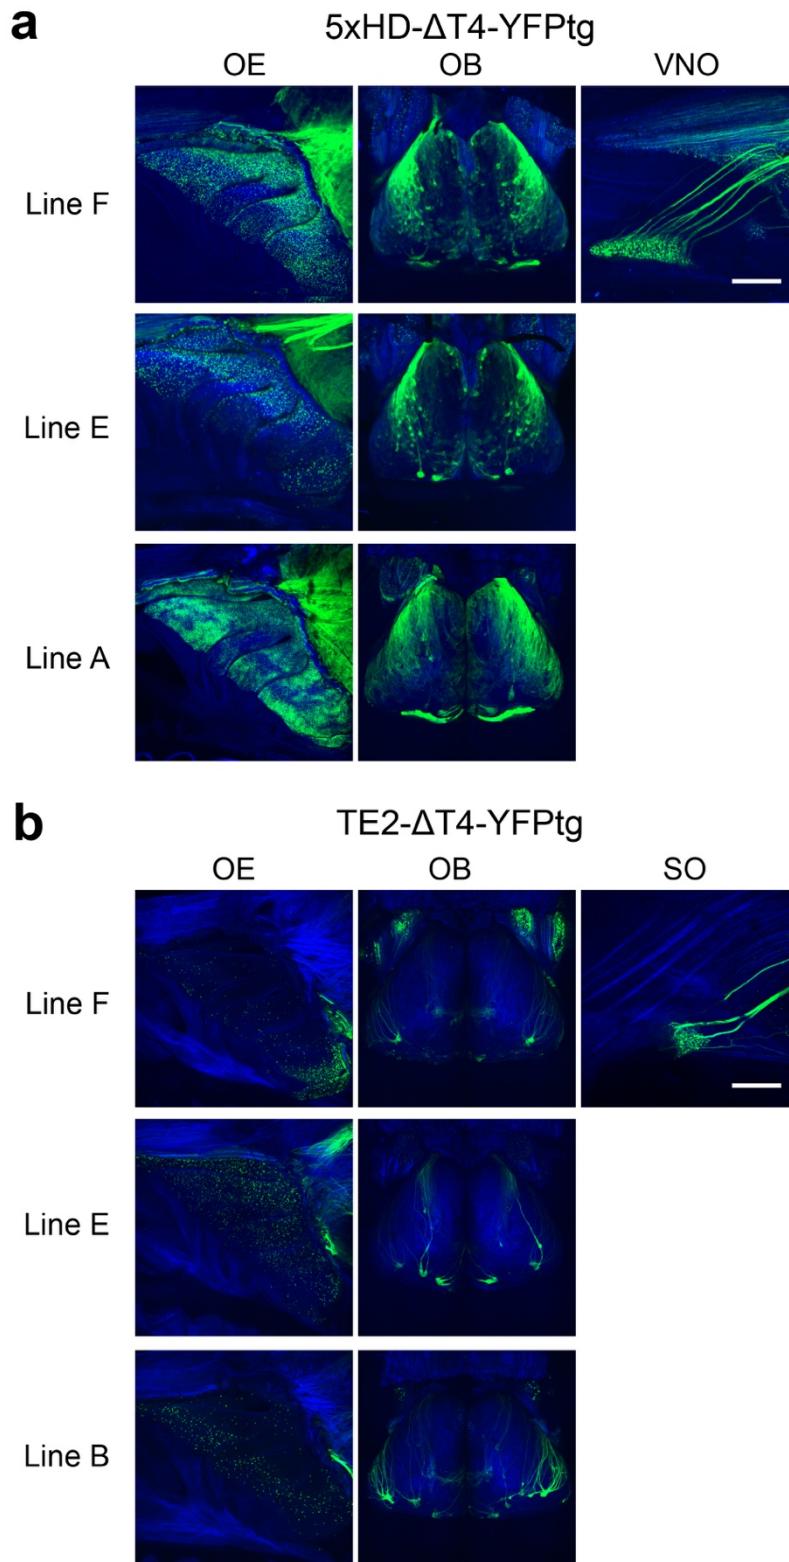

**Figure S1. Characterization of alternate transgenic lines**

Confocal images of YFP expression (green) in independent transgenic lines not depicted in main figures. (a) wholemounts of olfactory epithelium (OE), olfactory bulb (OB) and vomeronasal organ (VNO) for 3 out of 5 5xHD- $\Delta$ T4-YFPtg lines. (b) wholemounts of OE, OB and septal organ (SO) for 3 out of 5 TE2- $\Delta$ T4-YFPtg lines. Scale bars are 1000  $\mu$ m in OE, OB and VNO panels, and 500  $\mu$ m in SO panel.







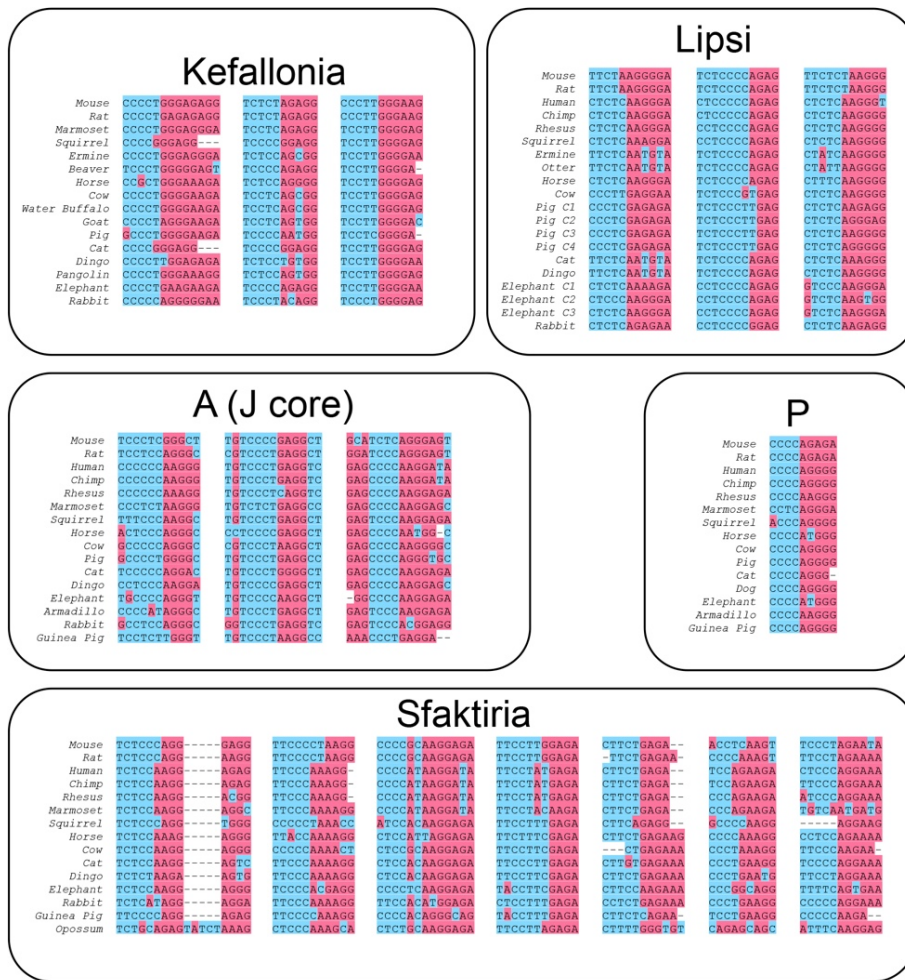

**Figure S4. Conserved O/E-like sites in known functional OR enhancers.**

Sequence alignments showing conserved O/E-like sites (approximate matches to the consensus YCCCNNGGGR) in olfactory enhancers across a subset of eutherian mammals. Sequence is highlighted purines (magenta) and pyrimidines (cyan). The enhancer H is not included as it lacks a conserved O/E-like site.

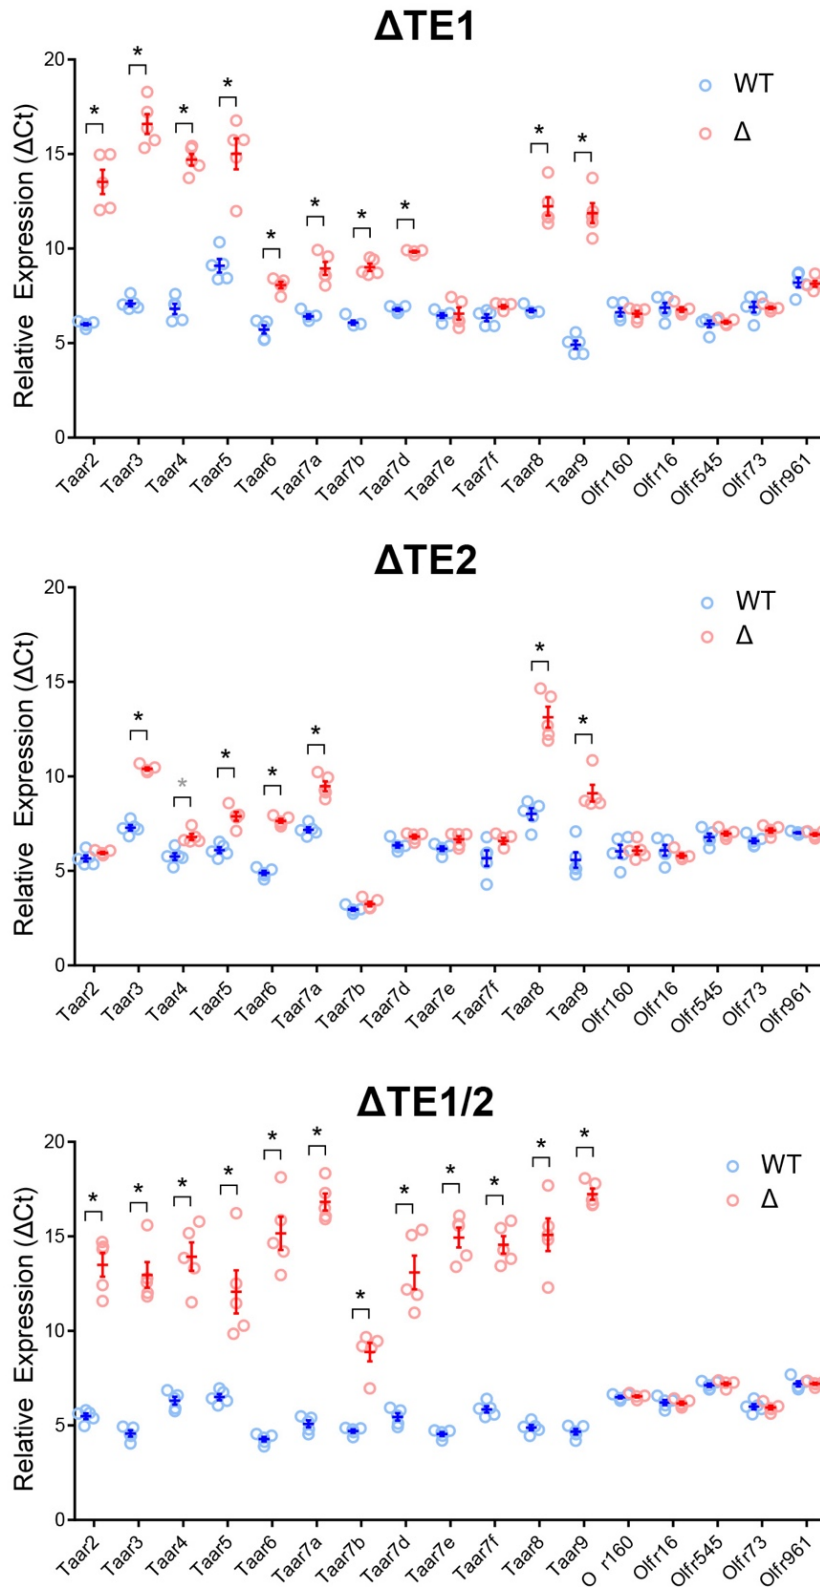

**Figure S5. Raw qPCR data for statistical analysis**

Raw  $\Delta$ Ct data for  $\Delta$ TE1,  $\Delta$ TE2 and  $\Delta$ TE1/2 mice shown in Fig. 6 and 8 (n=5 animals per genotype). Wild-type shown in blue and deletion in red (error bars indicate mean  $\pm$  SEM). Larger  $\Delta$ Ct values indicate fewer transcript copies (lower expression). Pairwise comparisons from one-way ANOVA are indicated. Black \* =  $p < 0.01$ ; grey \* =  $p < 0.05$  two-sided, one-way ANOVA, Dunn-Sidak correction for multiple comparisons.
